# Supplementary material for: Cardiac and Kidney Benefits of Empagliflozin in Heart Failure Across the Spectrum of Kidney Function: Insights From EMPEROR-Reduced
Source: PubMed Central journal article supplement — Circulation. 2020 Oct 23;143(4):310–21. doi: 10.1161/CIRCULATIONAHA.120.051685 (PMC7834910; doi:10.1161/circulationaha.120.051685), 2020-10-23
Supplement: cir-143-310-s001.pdf [file cir-143-310-s001.pdf]

## Supplemental Material

**Supplementary Table I. Baseline characteristics of patients by eGFR (CKD-EPI) category at Baseline**

|                                              | eGFR (CKD-EPI, mL/min/1.73 m <sup>2</sup> ) |                       |                      |                      |                   |
|----------------------------------------------|---------------------------------------------|-----------------------|----------------------|----------------------|-------------------|
|                                              | ≥90<br>(n=449)                              | 60 to <90<br>(n=1480) | 45 to <60<br>(n=900) | 30 to <45<br>(n=694) | <30<br>(n=205)    |
| Age, years                                   | 53.9±10.2                                   | 65.5±10.0             | 69.7±9.2             | 72.4±8.6             | 73.9±8.4          |
| Female sex                                   | 106 (23.6)                                  | 320 (21.6)            | 211 (23.4)           | 192 (27.7)           | 64 (31.2)         |
| Race                                         |                                             |                       |                      |                      |                   |
| White                                        | 237 (52.8)                                  | 1036 (70.0)           | 662 (73.6)           | 542 (78.1)           | 150 (73.2)        |
| Black                                        | 58 (12.9)                                   | 106 (7.2)             | 48 (5.3)             | 26 (3.7)             | 19 (9.3)          |
| Asian                                        | 136 (30.3)                                  | 271 (18.3)            | 143 (15.9)           | 90 (13.0)            | 32 (15.6)         |
| Other                                        | 16 (3.6)                                    | 43 (2.9)              | 30 (3.3)             | 21 (3.0)             | 4 (2.0)           |
| Missing                                      | 2 (0.4)                                     | 24 (1.6)              | 17 (1.9)             | 15 (2.2)             | 0                 |
| Region                                       |                                             |                       |                      |                      |                   |
| North America                                | 32 (7.1)                                    | 162 (10.9)            | 110 (12.2)           | 81 (11.7)            | 40 (19.5)         |
| Latin America                                | 189 (42.1)                                  | 549 (37.1)            | 275 (30.6)           | 207 (29.8)           | 65 (31.7)         |
| Europe                                       | 95 (21.2)                                   | 499 (33.7)            | 373 (41.4)           | 314 (45.2)           | 71 (34.6)         |
| Asia                                         | 81 (18.0)                                   | 212 (14.3)            | 108 (12.0)           | 67 (9.7)             | 25 (12.2)         |
| Other                                        | 52 (11.6)                                   | 58 (3.9)              | 34 (3.8)             | 25 (3.6)             | 4 (2.0)           |
| Time since diagnosis of heart failure, years | 4.2±4.9                                     | 5.8±6.2               | 6.6±6.5              | 7.2±6.7              | 7.2±6.8           |
| NYHA functional classification               |                                             |                       |                      |                      |                   |
| II                                           | 355 (79.1)                                  | 1126 (76.1)           | 668 (74.2)           | 515 (74.2)           | 135 (65.9)        |
| III                                          | 93 (20.7)                                   | 346 (23.4)            | 228 (25.3)           | 174 (25.1)           | 68 (33.2)         |
| IV                                           | 1 (0.2)                                     | 8 (0.5)               | 4 (0.4)              | 5 (0.7)              | 2 (1.0)           |
| BMI, kg/m <sup>2</sup>                       | 27.8±5.8                                    | 27.9±5.4              | 27.7±5.1             | 28.1±5.3             | 28.0±5.8          |
| Heart rate, beats/min                        | 74.1±12.3                                   | 71.6±11.8             | 70.8±11.4            | 69.9±11.2            | 69.5±11.8         |
| Systolic blood pressure, mm Hg               | 120±15.6                                    | 122±15.2              | 122±16.0             | 122±15.9             | 123±16.1          |
| Diastolic blood pressure, mm Hg              | 75.8±10.9                                   | 74.8±10.5             | 73.1±11.1            | 72.3±10.5            | 71.9±11.0         |
| LVEF, %                                      | 26.8±6.1                                    | 27.2±6.0              | 27.6±5.9             | 28.1±6.0             | 28.0±6.5          |
| NT-proBNP, pg/mL, median (IQR)               | 1404 (839, 2507)                            | 1634 (992, 2823)      | 2024 (1274, 3625)    | 2583 (1474, 4610)    | 3343 (1772, 7033) |
| Principal cause of heart failure             |                                             |                       |                      |                      |                   |
| Ischemic                                     | 169 (37.6%)                                 | 765 (51.7%)           | 488 (54.2%)          | 385 (55.5%)          | 121 (59.0)        |
| Medical history                              |                                             |                       |                      |                      |                   |
| HHF in last 12 months                        | 155 (34.5)                                  | 448 (30.3)            | 264 (29.3)           | 218 (31.4)           | 66 (32.2)         |
| Atrial fibrillation*                         | 72 (16.0)                                   | 481 (32.5)            | 397 (44.1)           | 329 (47.4)           | 90 (43.9)         |
| Hypertension                                 | 264 (58.8)                                  | 1026 (69.3)           | 678 (75.3)           | 551 (79.4)           | 178 (86.8)        |
| Diabetes                                     | 237 (52.8)                                  | 678 (45.8)            | 457 (50.8)           | 364 (52.4)           | 118 (57.6)        |
| UACR, mg/g, median (IQR)                     | 19 (7, 72)                                  | 18 (7, 67)            | 25 (10, 91)          | 30 (10, 91)          | 38 (13, 262)      |
| Device therapy                               |                                             |                       |                      |                      |                   |
| Implantable cardioverter-defibrillator†      | 70 (15.6)                                   | 429 (29.0)            | 333 (37.0)           | 273 (39.3)           | 65 (31.7)         |
| Cardiac resynchronization therapy‡           | 15 (3.3)                                    | 120 (8.1)             | 124 (13.8)           | 153 (22.0)           | 30 (14.6)         |
| Heart failure medication                     |                                             |                       |                      |                      |                   |
| ACE inhibitor                                | 228 (50.8)                                  | 726 (49.1)            | 404 (44.9)           | 279 (40.2)           | 66 (32.2)         |
| ARB§                                         | 96 (21.4)                                   | 360 (24.3)            | 208 (23.1)           | 181 (26.1)           | 62 (30.2)         |

|                         | eGFR (CKD-EPI, mL/min/1.73 m <sup>2</sup> ) |                       |                      |                      |                |
|-------------------------|---------------------------------------------|-----------------------|----------------------|----------------------|----------------|
|                         | ≥90<br>(n=449)                              | 60 to <90<br>(n=1480) | 45 to <60<br>(n=900) | 30 to <45<br>(n=694) | <30<br>(n=205) |
| ARNI                    | 87 (19.4)                                   | 279 (18.9)            | 184 (20.4)           | 143 (20.6)           | 34 (16.6)      |
| Diuretics <sup>§§</sup> | 378 (84.2)                                  | 1237 (83.6)           | 794 (88.2)           | 641 (92.4)           | 197 (96.1)     |
| MRA                     | 368 (82.0)                                  | 1082 (73.1)           | 656 (72.9)           | 444 (64.0)           | 109 (53.2)     |
| Beta blocker            | 420 (93.5)                                  | 1409 (95.2)           | 848 (94.2)           | 659 (95.0)           | 196 (95.6)     |
| Cardiac glycosides      | 85 (18.9)                                   | 253 (17.1)            | 145 (16.1)           | 88 (12.7)            | 23 (11.2)      |
| Nitrates                | 43 (9.6)                                    | 174 (11.8)            | 120 (13.3)           | 112 (16.1)           | 47 (22.9)      |
| Ivabradine              | 48 (10.7)                                   | 100 (6.8)             | 58 (6.4)             | 40 (5.8)             | 14 (6.8)       |
| Hydralazine             | 11 (2.4)                                    | 35 (2.4)              | 31 (3.4)             | 27 (3.9)             | 22 (10.7)      |
| Other medication        |                                             |                       |                      |                      |                |
| Lipid-lowering drugs    | 276 (61.5)                                  | 1006 (68.0)           | 647 (71.9)           | 530 (76.4)           | 153 (74.6)     |
| Anti-thrombotic drugs   | 314 (69.9)                                  | 1178 (79.6)           | 778 (86.4)           | 615 (88.6)           | 180 (87.8)     |

Data are n (%) or mean±SD for randomized patients, unless otherwise stated. ACE indicates angiotensin-converting enzyme; ARB, angiotensin-receptor blocker; ARNI, angiotensin-receptor neprilysin inhibitor; BMI, body mass index; CKD, chronic kidney disease; CKD-EPI, Chronic Kidney Disease Epidemiology Collaboration equation; eGFR, estimated glomerular filtration rate; HHF, hospitalization for heart failure; LVEF, left ventricular ejection fraction; MRA, mineralocorticoid receptor antagonist; NT-pro BNP, N-terminal pro-natriuretic brain peptide; NYHA, New York Heart Association; SBP, systolic blood pressure; and UACR, urine albumin-to-creatinine ratio. \*Atrial fibrillation reported in any electrocardiogram before treatment intake or history of atrial fibrillation reported as medical history. †Implantable cardioverter defibrillator with or without cardiac resynchronization therapy. ‡Cardiac resynchronization therapy with or without a defibrillator. §Excluding valsartan when taken with sacubitril because sacubitril/valsartan is shown as ARNI. §§Diuretics other than MRAs.

**Supplementary Table II. Baseline characteristics of patients by UACR category at baseline**

|                                                     | UACR (mg/g)      |                        |                   |
|-----------------------------------------------------|------------------|------------------------|-------------------|
|                                                     | <30<br>(n=2078)  | 30 to ≤300<br>(n=1236) | >300<br>(n=396)   |
| Age, years                                          | 66.9±11.2        | 67.5±10.8              | 64.0±10.5         |
| Female sex                                          | 532 (25.6)       | 280 (22.7)             | 77 (19.4)         |
| Race                                                |                  |                        |                   |
| White                                               | 1499 (72.1)      | 856 (69.3)             | 257 (64.9)        |
| Black                                               | 133 (6.4)        | 91 (7.4)               | 33 (8.3)          |
| Asian                                               | 356 (17.1)       | 231 (18.7)             | 85 (21.5)         |
| Other                                               | 61 (2.9)         | 38 (3.1)               | 15 (3.8)          |
| Missing                                             | 29 (1.4)         | 20 (1.6)               | 6 (1.5)           |
| Region                                              |                  |                        |                   |
| North America                                       | 207 (10.0)       | 169 (13.7)             | 48 (12.1)         |
| Latin America                                       | 676 (32.5)       | 439 (35.5)             | 168 (42.4)        |
| Europe                                              | 834 (40.1)       | 404 (32.7)             | 99 (25.0)         |
| Asia                                                | 256 (12.3)       | 176 (14.2)             | 61 (15.4)         |
| Other                                               | 105 (5.1)        | 48 (3.9)               | 20 (5.1)          |
| Time since diagnosis of heart failure, years        | 6.0±6.3          | 6.4±6.5                | 5.9±5.7           |
| NYHA functional classification                      |                  |                        |                   |
| II                                                  | 1627 (78.3)      | 887 (71.8)             | 274 (69.2)        |
| III                                                 | 443 (21.3)       | 342 (27.7)             | 117 (29.5)        |
| IV                                                  | 8 (0.4)          | 7 (0.6)                | 5 (1.3)           |
| BMI, kg/m <sup>2</sup>                              | 27.65±5.25       | 27.95±5.57             | 28.78±5.51        |
| Heart rate, beats/min                               | 69.9±11.2        | 72.8±12.1              | 74.1±12.3         |
| Systolic blood pressure, mm Hg                      | 120.0±14.5       | 122.2±16.1             | 131.2±16.9        |
| Diastolic blood pressure, mm Hg                     | 72.6±10.3        | 74.4±10.9              | 79.5±11.4         |
| LVEF, %                                             | 27.4±5.9         | 27.4±6.1               | 28.1±6.2          |
| NT-proBNP, pg/mL, median (IQR)                      | 1584 (941, 2712) | 2323 (1367, 4287)      | 2975 (1633, 5960) |
| Principal cause of heart failure                    |                  |                        |                   |
| Ischemic                                            | 1070 (51.5)      | 642 (51.9)             | 203 (51.3)        |
| Medical history                                     |                  |                        |                   |
| HHF in last 12 months                               | 617 (29.7)       | 391 (31.6)             | 139 (35.1)        |
| Atrial fibrillation*                                | 721 (34.7)       | 510 (41.3)             | 131 (33.1)        |
| Hypertension                                        | 1426 (68.6)      | 943 (76.3)             | 317 (80.1)        |
| Diabetes                                            | 849 (40.9)       | 720 (58.3)             | 275 (69.4)        |
| eGFR (CKD-EPI), mL/min/1.73 m <sup>2</sup>          | 64.0±21.3        | 60.0±21.1              | 58.5±23.6         |
| eGFR (CKD-EPI) <60 mL/min/1.73 m <sup>2</sup>       | 908 (43.7)       | 660 (53.4)             | 217 (54.8)        |
| Device therapy                                      |                  |                        |                   |
| Implantable cardioverter-defibrillator <sup>†</sup> | 688 (33.1)       | 386 (31.2)             | 89 (22.5)         |
| Cardiac resynchronization therapy <sup>‡</sup>      | 252 (12.1)       | 152 (12.3)             | 34 (8.6)          |
| Heart failure medication                            |                  |                        |                   |
| ACE inhibitor                                       | 1026 (49.4)      | 530 (42.9)             | 141 (35.6)        |
| ARB <sup>§</sup>                                    | 466 (22.4)       | 315 (25.5)             | 122 (30.8)        |
| ARNI                                                | 382 (18.4)       | 266 (21.5)             | 75 (18.9)         |
| Diuretics <sup>§§</sup>                             | 1792 (86.2)      | 1087 (87.9)            | 352 (88.9)        |
| MRA                                                 | 1552 (74.7)      | 852 (68.9)             | 242 (61.1)        |
| Beta blocker                                        | 1965 (94.6)      | 1174 (95.0)            | 377 (95.2)        |
| Cardiac glycosides                                  | 300 (14.4)       | 209 (16.9)             | 84 (21.2)         |
| Nitrates                                            | 235 (11.3)       | 183 (14.8)             | 75 (18.9)         |
| Ivabradine                                          | 145 (7.0)        | 84 (6.8)               | 29 (7.3)          |
| Hydralazine                                         | 39 (1.9)         | 54 (4.4)               | 32 (8.1)          |
| Other medication                                    |                  |                        |                   |

|                       | UACR (mg/g)     |                        |                 |
|-----------------------|-----------------|------------------------|-----------------|
|                       | <30<br>(n=2078) | 30 to ≤300<br>(n=1236) | >300<br>(n=396) |
| Lipid-lowering drugs  | 1444 (69.5)     | 869 (70.3)             | 286 (72.2)      |
| Anti-thrombotic drugs | 1690 (81.3)     | 1029 (83.3)            | 332 (83.8)      |

Data are n (%) or mean±SD for randomized patients, unless otherwise stated. ACE indicates angiotensin-converting enzyme; ARB, angiotensin-receptor blocker; ARNI, angiotensin-receptor neprilysin inhibitor; BMI, body mass index; CKD, chronic kidney disease; CKD-EPI, Chronic Kidney Disease Epidemiology Collaboration equation; eGFR, estimated glomerular filtration rate; HHF, hospitalization for heart failure; LVEF, left ventricular ejection fraction; MRA, mineralocorticoid receptor antagonist; NT-pro BNP, N-terminal pro-natriuretic brain peptide; NYHA, New York Heart Association; SBP, systolic blood pressure; and UACR, urine albumin-to-creatinine ratio. \*Atrial fibrillation reported in any electrocardiogram before treatment intake or history of atrial fibrillation reported as medical history. †Implantable cardioverter defibrillator with or without cardiac resynchronization therapy. ‡Cardiac resynchronization therapy with or without a defibrillator. §Excluding valsartan when taken with sacubitril because sacubitril/valsartan is shown as ARNI. §§Diuretics other than MRAs.
